# Supplementary material
Source: PubMed Central journal article supplement (PMC8278812)
Supplement: 705_2021_5148_MOESM1_ESM.pdf [file 705_2021_5148_MOESM1_ESM.pdf]

# Clinical evaluation of a multiplex RT-PCR assay for detection of SARS-CoV-2 in individual and pooled upper respiratory tract samples

## Archives of Virology

Melissa Laverack<sup>a</sup>, Rebecca L. Tallmadge<sup>a</sup>, Roopa Venugopalan<sup>a</sup>, Brittany Cronk<sup>a</sup>, XiuLin Zhang<sup>a</sup>, Rolf Rauh<sup>b</sup>, Amy Saunders<sup>b</sup>, William M. Nelson<sup>b</sup>, Elizabeth Plocharczyk<sup>c</sup>, Diego G. Diel<sup>a#</sup>

<sup>a</sup>Department of Population Medicine and Diagnostic Sciences, Animal Health Diagnostic Center, College of Veterinary Medicine, Cornell COVID-19 Testing Laboratory, Cornell University, Ithaca, New York, USA

<sup>b</sup>Tetracore Inc., Rockville, Maryland, USA

<sup>c</sup>Cayuga Medical Center, Cayuga Health System, Ithaca, New York, USA

#Address correspondence to: Diego G. Diel, [dgdziel@cornell.edu](mailto:dgdziel@cornell.edu)

**Supplementary Table 1.** *In silico* cross-reactivity analysis of the of the EZ-SARS-CoV-2 Real-Time RT-PCR assay primers and probes.

| Pathogen                    | Strain                                                                       | GenBank Accession # |
|-----------------------------|------------------------------------------------------------------------------|---------------------|
| Adenovirus                  | Human adenovirus type 1, complete genome                                     | AC_000017.1         |
| Bordetella pertussis        | Bordetella pertussis strain B3921, complete genome                           | CP011448.1          |
| Candida albicans            | Candida albicans strain L757 mitochondrion, complete genome                  | NC_018046.1         |
| <i>Chlamydia pneumoniae</i> | Chlamydia pneumoniae genome assembly PB2, chromosome: 1                      | NZ_LN847241.1       |
| Enterovirus                 | Human enterovirus 68 isolate EV68_NL_201013421 VP1 protein gene, partial cds | JF896312.1          |
| Haemophilus influenzae      | Haemophilus influenzae PittGG, complete genome                               | CP000672.1          |
| Human coronavirus 229E      | Human coronavirus 229E strain 229E/human/USA/932-72/1993, complete genome    | KF514432.1          |

|                              |                                                                                                                                                                  |            |
|------------------------------|------------------------------------------------------------------------------------------------------------------------------------------------------------------|------------|
| Human coronavirus 229E       | Human coronavirus 229E strain 229E/human/USA/933-40/1993, complete genome                                                                                        | KF514433.1 |
| Human coronavirus HKU1       | Human coronavirus HKU1 isolate SI17244, complete genome                                                                                                          | MH940245.1 |
| Human coronavirus HKU1       | Human coronavirus HKU1 strain HKU1/human/USA/HKU1-18/2010, complete genome                                                                                       | KF430201.1 |
| Human coronavirus NL63       | Human coronavirus NL63 strain NL63/human/USA/891-4/1989, complete genome                                                                                         | KF530114.1 |
| Human coronavirus NL63       | Human coronavirus NL63 strain NL63/human/USA/905-25/1990, complete genome                                                                                        | KF530113.1 |
| Human coronavirus OC43       | Human coronavirus OC43 isolate LRTI_238, complete genome                                                                                                         | KX344031.1 |
| Human coronavirus OC43       | Human coronavirus OC43 strain OC43/human/USA/971-5/1997, complete genome                                                                                         | KF530099.1 |
| Human Metapneumovirus (hMPV) | Human metapneumovirus strain HMPV/Homo sapiens/PER/FPP00726/2011/A, complete genome                                                                              | KJ627437.1 |
| Influenza A                  | Influenza A virus (A/New York/PV305/2017(H1N1)) segment 2 polymerase PB1 (PB1) gene, complete cds and functional PB1-F2 protein (PB1-F2) gene, complete sequence | MH798556.1 |
| Influenza B                  | Influenza B virus (B/Nicaragua/8689_13/2017) segment 2 polymerase PB2 (PB2) gene, complete cds                                                                   | MK969560.1 |
| Legionella pneumophila       | Legionella pneumophila strain Philadelphia 1 CDC, complete genome                                                                                                | CP015928.1 |
| MERS-Coronavirus             | Middle East respiratory syndrome-related coronavirus strain HCoV-EMC, complete genome                                                                            | MH013216.1 |
| Mycobacterium tuberculosis   | Mycobacterium tuberculosis DNA, complete genome, strain: HN-506                                                                                                  | AP018036.1 |
| Mycoplasma pneumoniae        | Mycoplasma pneumoniae strain 14-637 chromosome, complete genome                                                                                                  | CP039772.1 |
| Parainfluenza 1              | Human parainfluenza virus 1 isolate NM001, complete genome                                                                                                       | KX639498.1 |
| Parainfluenza 2              | Human parainfluenza virus 2 isolate VIROAF10, complete genome                                                                                                    | KM190939.1 |
| Parainfluenza 3              | Human parainfluenza virus 3 strain HPIV3/AUS/3/2007, complete genome                                                                                             | KF530243.1 |
| Parainfluenza 4              | Human parainfluenza virus 4a isolate HPIV4_DK (459), complete genome                                                                                             | KF483663.1 |
| Pneumocystis jirovecii       | Pneumocystis jirovecii isolate SW7_full mitochondrion, complete genome                                                                                           | MH010446.1 |
| Pseudomonas aeruginosa       | Pseudomonas aeruginosa UCBPP-PA14, complete genome                                                                                                               | CP000438.1 |

|                             |                                                                                |             |
|-----------------------------|--------------------------------------------------------------------------------|-------------|
| Respiratory syncytial virus | Respiratory syncytial virus strain B/WI/629-Q0190/10, complete genome          | JN032120.1  |
| Rhinovirus                  | Human rhinovirus 14, complete genome                                           | NC_001490.1 |
| SARS-coronavirus            | SARS coronavirus A022, complete genome                                         | AY686863.1  |
| SARS-coronavirus            | SARS coronavirus CUHK-AG01, complete genome                                    | AY345986.1  |
| SARS-CoV-2                  | Wuhan seafood market pneumonia virus isolate Wuhan-Hu-1, complete genome       | NC_045512.2 |
| Staphylococcus epidermidis  | Staphylococcus epidermidis strain SP3 16S ribosomal RNA gene, partial sequence | KY750253.1  |
| Streptococcus pneumoniae    | Streptococcus pneumoniae strain D39V chromosome, complete genome               | CP027540.1  |
| Streptococcus pyogenes      | Streptococcus pyogenes MGAS8232, complete genome                               | AE009949.1  |
| Streptococcus salivarius    | Streptococcus salivarius strain LAB813 chromosome, complete genome             | CP040804.1  |

**Supplementary Table 2.** Specificity of EZ-SARS-CoV-2 RT-PCR assay.

| <b>Organism</b>                  | <b>Source</b> | <b>Isolate No.</b> | <b>Replicates Detected/Total</b> |
|----------------------------------|---------------|--------------------|----------------------------------|
| Human coronavirus 229E           | Zeptomatrix   | 0810229CF          | 0/3                              |
| Human coronavirus OC43           | Zeptomatrix   | 0810024CF          | 0/3                              |
| Human coronavirus NL63           | BEI Resources | NR-470             | 0/3                              |
| SARS coronavirus                 | BEI Resources | NR-9547            | 0/3                              |
| MERS coronavirus                 | BEI Resources | NR-45843           | 0/3                              |
| Adenovirus Type 7A               | Zeptomatrix   | 0810021CF          | 0/3                              |
| Adenovirus Type 1                | Zeptomatrix   | 0810050CF          | 0/3                              |
| Adenovirus Type 4                | Zeptomatrix   | 0810070CF          | 0/3                              |
| Human metapneumovirus 16 Type A1 | Zeptomatrix   | 0810161CF          | 0/3                              |
| Parainfluenza virus 1            | BEI Resources | NR-48680           | 0/3                              |
| Parainfluenza virus 2            | BEI Resources | NR-3229            | 0/3                              |
| Parainfluenza virus 3            | BEI Resources | NR-3233            | 0/3                              |
| Parainfluenza virus 4A           | BEI Resources | NR-3237            | 0/3                              |
| Parainfluenza virus 4B           | BEI Resources | NR-3238            | 0/3                              |
| Influenza A H1N1                 | BEI Resources | NR-13663           | 0/3                              |
| Influenza A H3N2                 | BEI Resources | NR-41803           | 0/3                              |
| Influenza B                      | BEI Resources | NR-42006           | 0/3                              |

|                                         |               |           |     |
|-----------------------------------------|---------------|-----------|-----|
| Enterovirus Type 68                     | Zeptomatrix   | 0810237CF | 0/3 |
| Enterovirus 71                          | BEI Resources | NR-471    | 0/3 |
| Enterovirus D68                         | BEI Resources | NR-49131  | 0/3 |
| Respiratory syncytial virus A1998/3-2   | BEI Resources | NR-28529  | 0/3 |
| Respiratory syncytial virus B1          | BEI Resources | NR-4052   | 0/3 |
| Respiratory syncytial virus A1998/12-21 | BEI Resources | NR-28528  | 0/3 |
| Rhinovirus 20, 15-CV19                  | BEI Resources | NR-51439  | 0/3 |
| Rhinovirus 60, 2268-CV37                | BEI Resources | NR-51447  | 0/3 |
| Rhinovirus 34, 137-3                    | BEI Resources | NR-51451  | 0/3 |
| <i>Chlamydia pneumoniae</i>             | ATCC          | 53592     | 0/3 |
| <i>Haemophilus influenzae</i>           | ATCC          | 33391     | 0/3 |
| <i>Legionella pneumophila</i>           | Zeptomatrix   | 0801645   | 0/3 |
| <i>Mycobacterium tuberculosis</i>       | Zeptomatrix   | 0801660   | 0/3 |
| <i>Streptococcus pneumoniae</i>         | ATCC          | 49619     | 0/3 |
| <i>Streptococcus pyogenes</i>           | ATCC          | 10782     | 0/3 |
| <i>Bordetella pertussis</i>             | BEI Resources | NR-42460  | 0/3 |
| <i>Mycoplasma pneumoniae</i>            | Zeptomatrix   | 0801579   | 0/3 |
| <i>Pneumocystis jirovecii</i> (PJP)     | ATCC          | PRA-159   | 0/3 |
| Pooled human nasal wash                 | In-House      |           | 0/3 |
| <i>Candida albicans</i>                 | ATCC          | 18804     | 0/3 |
| <i>Pseudomonas aeruginosa</i>           | ATCC          | 27853     | 0/3 |
| <i>Staphylococcus epidermis</i>         | ATCC          | 14990     | 0/3 |
| <i>Streptococcus salivarius</i>         | ATCC          | 13419     | 0/3 |

**Supplementary Table 3.** Comparison of Tetracore EZ-SARS-CoV-2 Real-Time RT-PCR assay results with Xpert Xpress SARS-CoV-2 results for 60 NPS from testing laboratory W. Results determined on the ABI 7500 platform are on the left and results determined by the QuantStudio 5 platform are on the right. Estimates are followed by 95% confidence interval in parentheses.

| <b>ABI 7500</b>           | Xpert Xpress SARS-CoV-2 positive | Xpert Xpress SARS-CoV-2 negative | <b>QuantStudio 5</b>      | Xpert Xpress SARS-CoV-2 positive | Xpert Xpress SARS-CoV-2 negative |
|---------------------------|----------------------------------|----------------------------------|---------------------------|----------------------------------|----------------------------------|
| EZ positive               | 30                               | 2                                | EZ positive               | 30                               | 3                                |
| EZ negative               | 0                                | 28                               | EZ negative               | 0                                | 27                               |
| Diagnostic sensitivity    |                                  | 100<br>(100.00-100.00)           | Diagnostic sensitivity    |                                  | 100<br>(100.00-100.00)           |
| Diagnostic specificity    |                                  | 93.33<br>(84.41-102.26)          | Diagnostic specificity    |                                  | 90.00<br>(79.26-100.74)          |
| Positive predictive value |                                  | 93.75<br>(85.36-102.14)          | Positive predictive value |                                  | 90.91<br>(81.10-100.72)          |
| Negative predictive value |                                  | 100<br>(100.00-100.00)           | Negative predictive value |                                  | 100<br>(100.00-100.00)           |
| kappa                     |                                  | 0.95<br>(0.89-1.02)              | kappa                     |                                  | 0.93<br>(0.85-1.01)              |

**Supplementary Table 4.** Comparison of Tetracore EZ-SARS-CoV-2 Real-Time RT-PCR assay results with TaqPath COVID-19 results for 141 NPS from testing laboratory T. Results determined on the ABI 7500 platform are on the left and results determined by the QuantStudio 5 platform are on the right. Estimates are followed by 95% confidence interval in parentheses.

| <b>ABI 7500</b>           | TaqPath COVID-19 positive | TaqPath COVID-19 negative | <b>QuantStudio 5</b>      | TaqPath COVID-19 positive | TaqPath COVID-19 negative |
|---------------------------|---------------------------|---------------------------|---------------------------|---------------------------|---------------------------|
| EZ positive               | 66                        | 4                         | EZ positive               | 64                        | 3                         |
| EZ negative               | 4                         | 67                        | EZ negative               | 6                         | 68                        |
| Diagnostic sensitivity    |                           | 94.29<br>(88.85-99.72)    | Diagnostic sensitivity    |                           | 91.43<br>(84.87-97.99)    |
| Diagnostic specificity    |                           | 94.37<br>(89.00-99.73)    | Diagnostic specificity    |                           | 95.77<br>(91.10-100.45)   |
| Positive predictive value |                           | 94.29<br>(88.85-99.72)    | Positive predictive value |                           | 95.52<br>(90.57-100.47)   |
| Negative predictive value |                           | 94.37<br>(89.00-99.73)    | Negative predictive value |                           | 91.89<br>(85.67-98.11)    |
| kappa                     |                           | 0.92<br>(0.87-0.98)       | kappa                     |                           | 0.92<br>(0.86-0.97)       |
